# Supplementary material for: Hemogenic and aortic endothelium arise from a common hemogenic angioblast precursor and are specified by the Etv2 dosage
Source: PubMed Central journal article supplement — Proc Natl Acad Sci U S A. 2022 Mar 25;119(13):e2119051119. doi: 10.1073/pnas.2119051119 (PMC9060440; doi:10.1073/pnas.2119051119), 2022-03-25
Supplement: pnas.2119051119.sapp.pdf [file pnas.2119051119.sapp.pdf]

1

## 2 **Supplementary Information for**

3 **Hemogenic and aortic endothelium arise from a common hemogenic angioblast precursor**  
4 **and are specified by the Etv2 dosage**

5 **Shizheng ZHAO, Shachuan FENG, Ye TIAN and Zilong WEN**

6 **Zilong WEN**

7 **E-mail: zilong@ust.hk**

### 8 **This PDF file includes:**

9 Figs. S1 to S6

10 Table S1

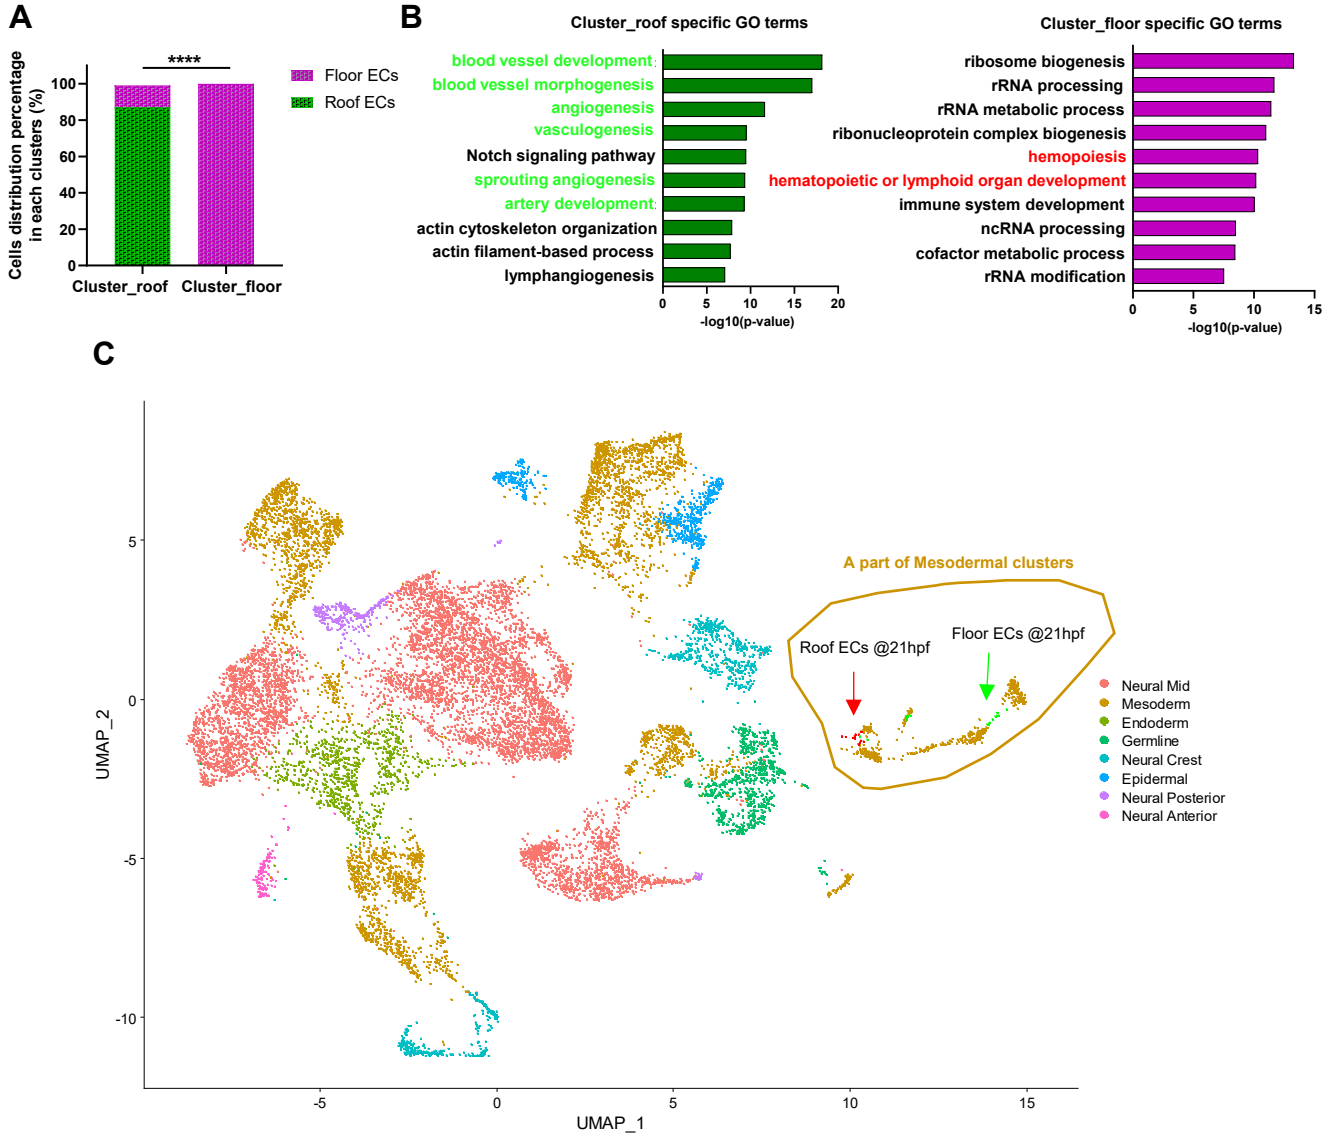

**Fig. S1.** Clustering and GO analysis of Cluster\_roof and Cluster\_floor. (A) Barplot graph shows the distribution percentage (%) of roof or floor cells in each cluster shown in Figure. 3A. Cluster\_roof was composed of 87% roof cells and 13% floor cells derived from 21 hpf and 28 hpf, while Cluster\_floor was composed of 100% floor cells derived from 21 hpf and 28 hpf. (B) GO term analysis on Cluster\_roof-specific and Cluster\_floor-specific gene-sets, in which the top 10 enriched terms were listed. Informative GO terms were highlighted in green or magenta, respectively. (C) UMAP-plot for cell clustering analysis of total integrated dataset. Dataset in this study (21 hpf) and the total Wagner's dataset (10 hpf, 4280 cells; 14 hpf, 4001 cells; 18 hpf, 6962 cells) are clustered together in (C). Cells in our dataset are predominantly (33/36; 92%) clustered with mesoderm cells defined in Wagner's study (ref.37). Fisher's exact test used (A), \*\*\*\* $p \leq 0.0001$ .

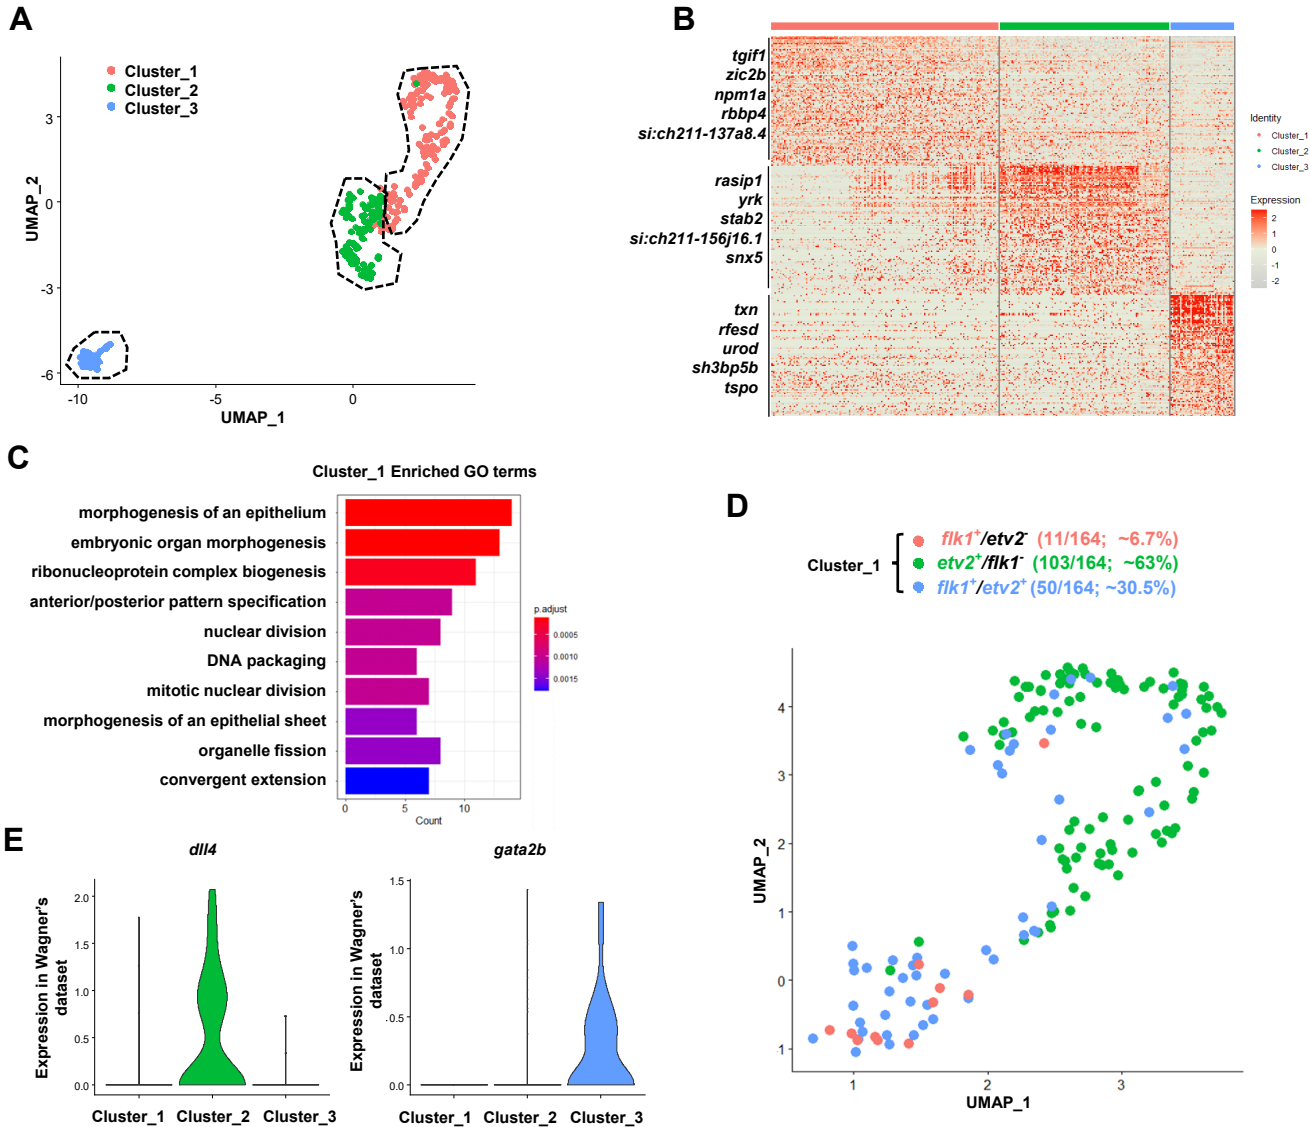

**Fig. S2.** Clustering and GO analysis of integrated dataset. (A) UMAP-plot for cell clustering analysis of integrated dataset after selecting *etv2*<sup>+</sup> and *flk1*<sup>+</sup> cells. Three clusters, Cluster\_1, Cluster\_2 and Cluster\_3, were identified. (B) Expression heatmap of the top 100 feature genes of three clusters in (A). Left panel shows the top 5 feature genes in each cluster. (C) GO analysis on Cluster\_1 top 100 gene-sets, in which the top 10 enriched terms were listed. (D) Enlarged plot of Cluster\_1 in (A) showing distribution and percentage of *etv2* or *flk1* single positive and *etv2/flk1* double positive cells. (E) Violin-plot for HEC marker *gata2b* and cEC marker *dll4* gene expression in Cluster\_1, Cluster\_2, and Cluster\_3 of cells from Wagner's dataset.

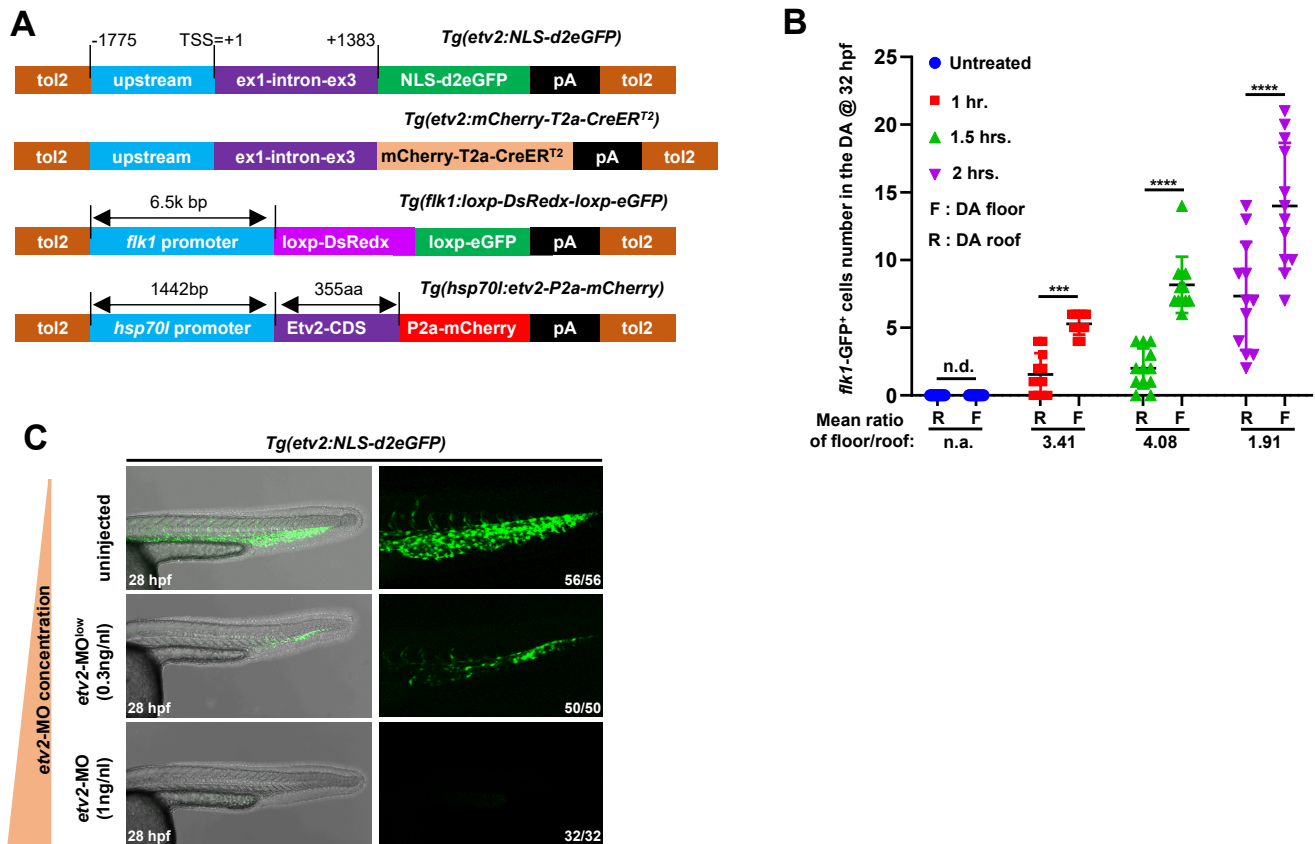

**Fig. S3.** Transgenic zebrafish construction and Etv2-dosage dependent lineage tracing. (A) Schematic diagram of *Tg(etv2:NLS-d2eGFP)*, *Tg(etv2:mCherry-T2a-CreERT<sup>2</sup>)*, *Tg(hsp70l:etv2-P2a-mCherry)* and *Tg(flk1:loxp-DsRedx-loxp-eGFP)* construction. (B) Lineage tracing using double transgenic line *Tg(etv2:mCherry-T2a-CreERT<sup>2</sup>);flk1:loxp-DsRedx-loxp-eGFP*. Fish were untreated or treated with median dose of 4-OHT (5 $\mu$ M) for different time lengths starting from 15 hpf and GFP<sup>+</sup> ECs in the DA roof or floor were quantified at 32 hpf. Mean ratio was calculated by the mean number of floor GFP<sup>+</sup>/roof GFP<sup>+</sup> cells in each conditions. (C) *etv2* MO dose testing. MO concentration  $\geq 1$  ng/ml with 2 nl injection volume per embryo was sufficient to completely block *etv2-d2eGFP* expression (referred as *etv2-MO* or *etv2* morphants), while MO concentration  $\leq 0.3$ ng/ml only partially blocked *etv2-d2eGFP* expression (referred as *etv2-MO<sup>low</sup>*). TSS, transcription starting site; pA, SV40 polyA sequence; n.d., not detectable; n.a., not available. Data are acquired by two independent experiment in (B) or two different clutches of embryos in (C). n/N reports the number of embryos with pattern in image/total embryos in (C). Embryos number for quantification in Untreated/0.5/1/1.5 hrs. groups are 10/9/11/12 in (B). Data are represented as mean  $\pm$  SD and exact p values were labelled in (B). Two-way ANOVA test used in (B). \*\*\*p  $\leq 0.001$ , \*\*\*\*p  $\leq 0.0001$ , n.d. not detectable, n.a. not available.

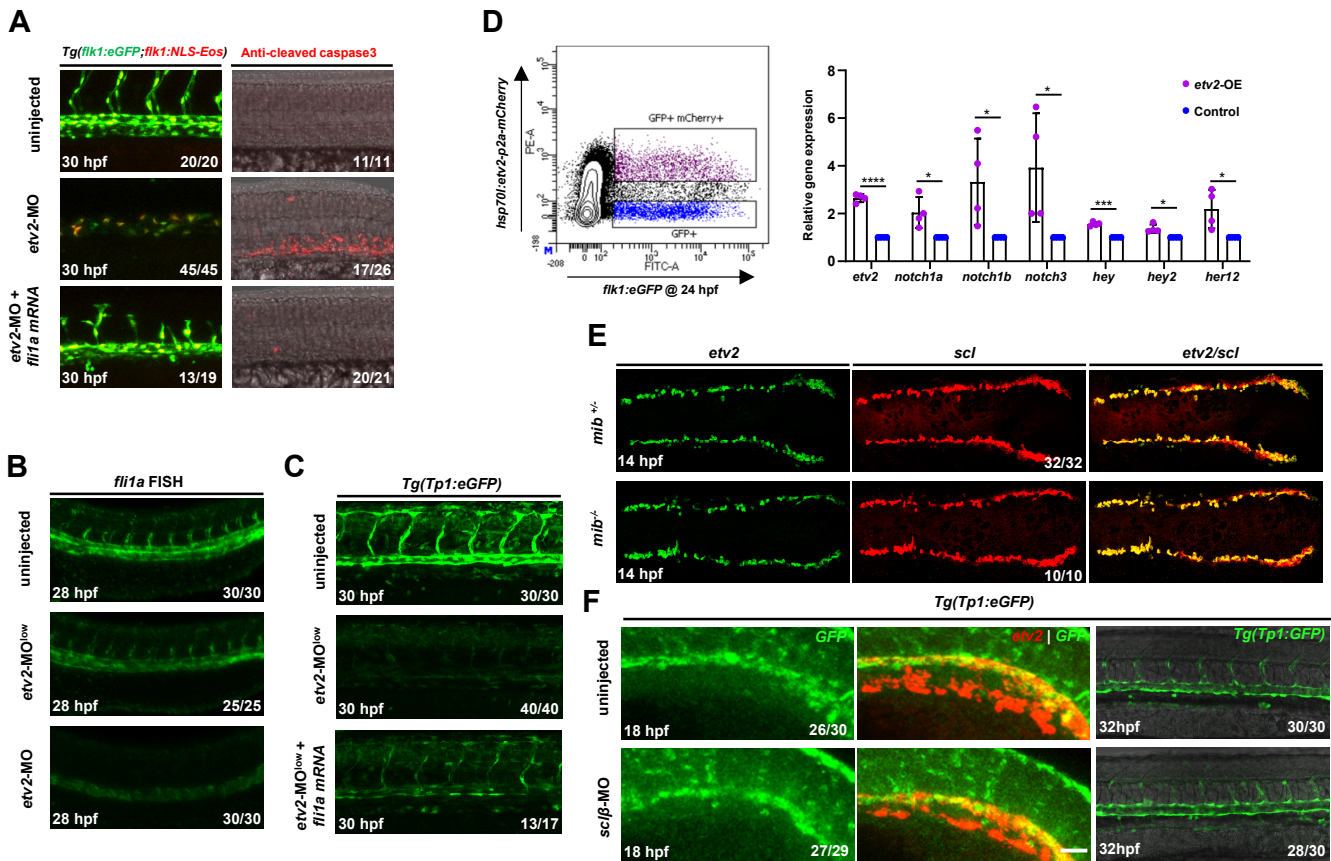

**Fig. S4.** Interplay among Etv2, Fli1a, Scf $\beta$  and Notch signaling. (A) *fli1a* mRNA injection partially rescued the DA structure and largely rescued EC apoptosis in *etv2* morphants. (B) FISH of *fli1a* in *etv2* morphants and *etv2-MO<sup>low</sup>* embryos. The embryos were injected with or without low or high dose of *etv2* MO. (C) *fli1a* mRNA injection partially rescued *Tp1-eGFP* reporter in low dose *etv2* MO knockdown embryos. (D) Flow cytometric and gene expression analysis in *flk1:eGFP<sup>+</sup>* endothelial cells with or without *etv2* overexpression. Etv2-mCherry was induced by waterbath heatshock at 14 hpf for 45min. (E) dFISH of *etv2* and *scl* (*scl $\alpha/\beta$* ) at 14 hpf in PLPM in *mib* sibling and *mib* mutant embryos. (F) dFISH of *eGFP* and *etv2* and representative single slice confocal image in the *scl $\beta$*  MO-injected *Tg(Tp1:eGFP)* and un.injected embryos. Data are representative of two independent experiments with four biological replicates (D) or two different clutches of embryos for dFISH or WISH assay (A-C,E-F). Scale bars, 30  $\mu$ m; TSS, transcription starting site; pA, SV40 polyA sequence; PLPM, posterior lateral plate mesoderm. Paired student's t tests used in (D). Data are represented as mean  $\pm$  SD, \* $p \leq 0.05$ , \*\*\* $p \leq 0.001$ , \*\*\*\* $p \leq 0.0001$ .

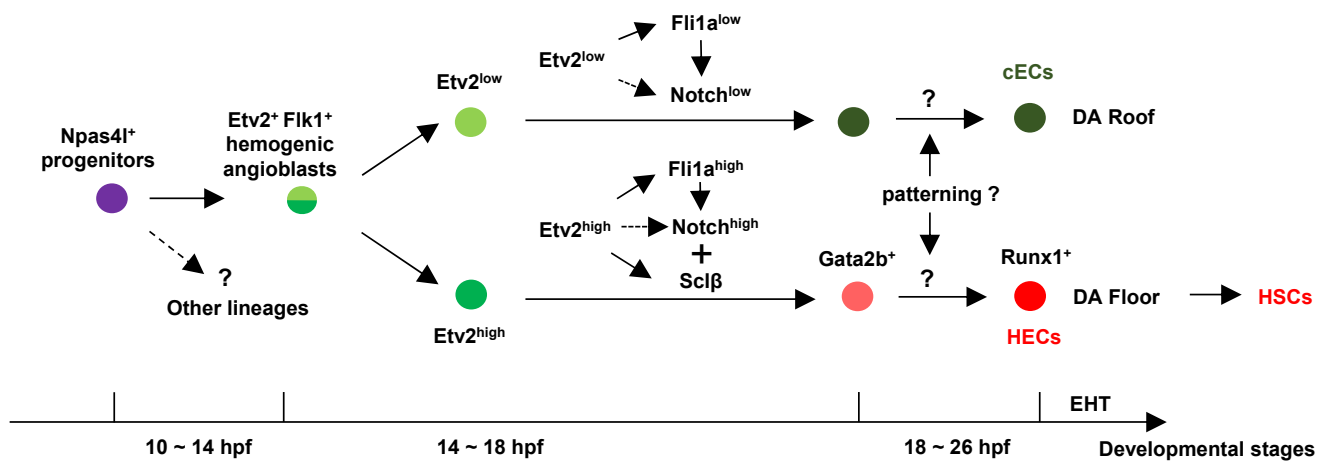

**Fig. S5.** Proposed working model of HEC and cEC fate specification. During 10-14 hpf,  $Etv2^+ Flk1^+$  hemogenic angioblasts are formed from  $Npas4l^+$  precursors in the posterior lateral plate mesoderm. Whether other lineages (e.g., primitive erythrocytes) and  $Etv2^+$  angioblasts arise from a common  $Npas4l^+$  precursor remain unknown. During 14-18 hpf, the first wave of  $Etv2^+ Flk1^+$  hemogenic angioblasts migrate towards midline to form the DA, during which HECs and cECs are specified as a result of  $Etv2$  dosage together with the differential activation of  $Etv2$  downstream factors,  $Fli1a$ ,  $Notch$  and  $Scl\beta$ . While  $Etv2^{low}-Fli1a^{low}-Notch^{low}$  axis is sufficient to maintain EC lineage survival, differentiation and DA identity, HEC lineage requires high level of  $Etv2$ ,  $Fli1a$ ,  $Notch$ , and  $Scl\beta$ . During 18-26 hpf, HEC and cEC precursors are patterned to the DA roof and floor respectively by an unknown mechanism.

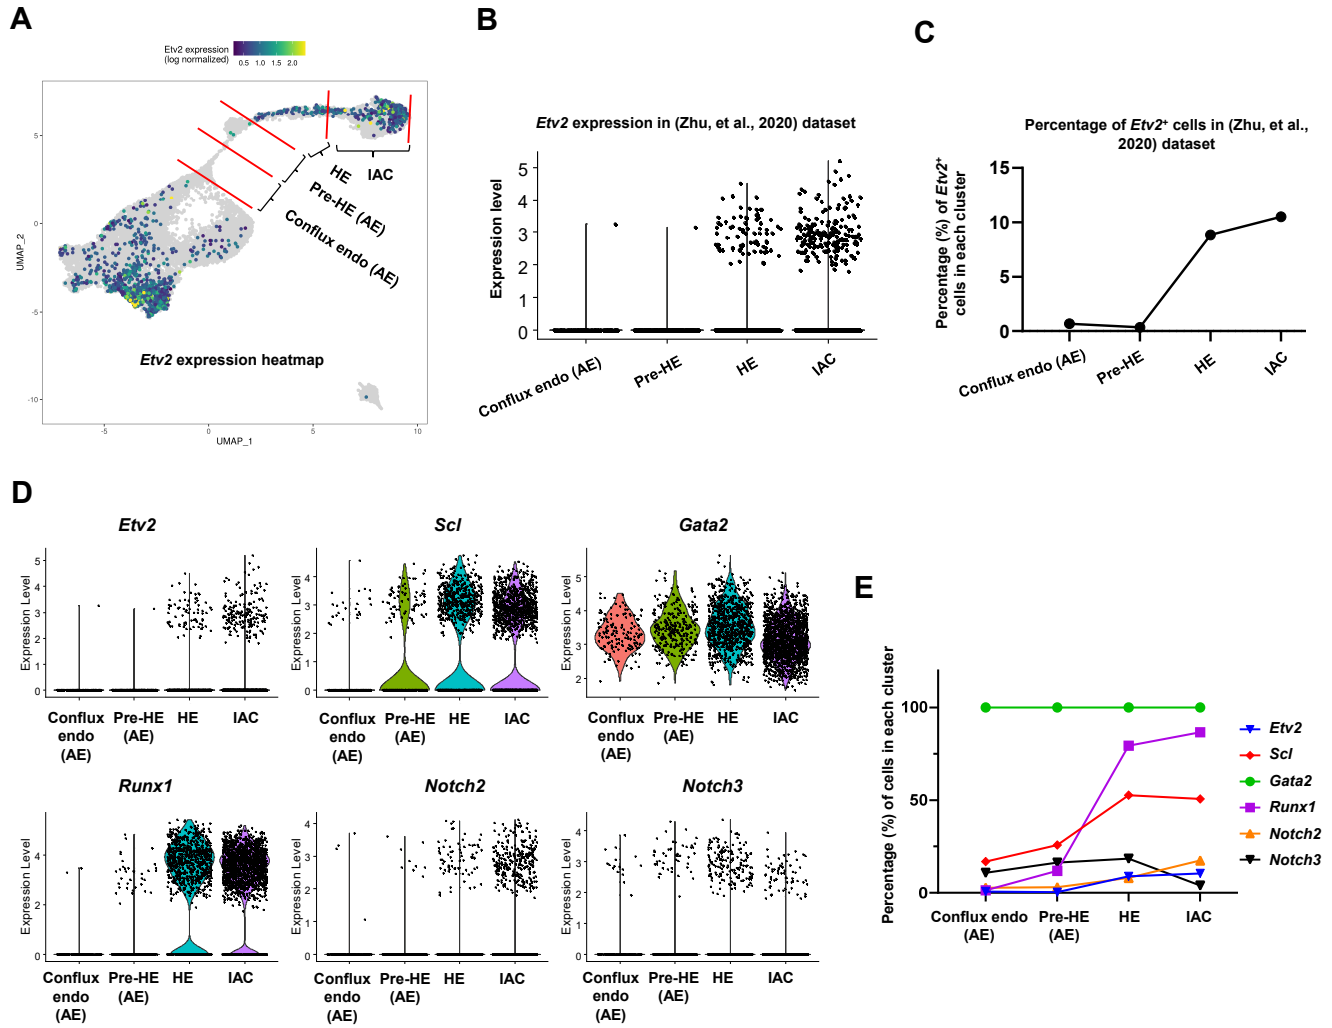

**Fig. S6.** Cross-species comparison between this study and murine scRNA-seq dataset. (A) Overview of *Etv2* gene expression heatmap in pre-HSC ontogeny trajectory from (Zhu, et al.,2020) study (ref.17). (B,C) *Etv2* gene expression level and percentage of expressing cells in defined clusters by (Zhu, et al.,2020) study. (D,E) *Etv2*, *Scf*, *Gata2*, *Runx1*, *Notch2* and *Notch3* gene expression levels and percentage of expressing cells in defined clusters. HSC, hematopoietic stem cell; AE, arterial endothelium; HE, hemogenic endothelium; IAC, intra-aortic clusters.

**Table S1. qPCR primers used in this study**

| qPCR primer name | Sequence(5'-3')         |
|------------------|-------------------------|
| gata2b-fwd       | ACCACCACACTCTGGAGAC     |
| gata2b-rev       | CTGTTGCGTGTCTGAATACC    |
| etv2-fwd         | GAGCTGTTGCACAAAGGTCA    |
| etv2-rev         | CAGAGAGGGACGAGGTTCTG    |
| fli1a-fwd        | TCGTCCTCAGCCAGATCC      |
| fli1a-rev        | TGGTTCCTTCCCAGGTGA      |
| scl-fwd          | GGAGATGCGGAACAGTATGG    |
| scl-rev          | GAAGGCACCGTTCACATTCT    |
| notch1a-fwd      | CGGGCCTGACGGATTCAC      |
| notch1a-rev      | GGACTCCAGCAGACGTTTAGC   |
| notch1b-fwd      | ACAGAAGGGGGAGACCAGTT    |
| notch1b-rev      | CCTCATGATAAGCACAATTCT   |
| notch3-fwd       | GCATTGACCGACCTAATGGA    |
| notch3-rev       | TGCTCTCACACAGTCTTCCTTC  |
| hey-fwd          | GCGCCTTTGAGAAACAGGGCTCA |
| hey-rev          | ACGGATGCGGAGGGGATCTGT   |
| hey2-fwd         | GTGGCTCACCTACAACGACA    |
| hey2-rev         | CTCCAATTGGCAGATCCCT     |
| her12-fwd        | GACATGGCACCCCACTCAGCC   |
| her12-rev        | GGTGCTGGGATCGTACTGTGG   |
